# Supplementary material for: Investigating imaging network markers of cognitive dysfunction and pharmacoresistance in newly diagnosed epilepsy: a protocol for an observational cohort study in the UK
Source: PubMed Central journal article supplement (PMC6797398; doi:10.1136/bmjopen-2019-034347), 2019-10-16
Supplement: bmjopen-2019-034347.reviewer_comments.pdf [file bmjopen-2019-034347.reviewer_comments.pdf]

## PEER REVIEW HISTORY

BMJ Open publishes all reviews undertaken for accepted manuscripts. Reviewers are asked to complete a checklist review form (<http://bmjopen.bmj.com/site/about/resources/checklist.pdf>) and are provided with free text boxes to elaborate on their assessment. These free text comments are reproduced below.

## ARTICLE DETAILS

|                            |                                                                                                                                                                            |
|----------------------------|----------------------------------------------------------------------------------------------------------------------------------------------------------------------------|
| <b>TITLE (PROVISIONAL)</b> | A protocol for an observational cohort study in the UK investigating imaging network markers of cognitive dysfunction and pharmaco-resistance in newly diagnosed epilepsy. |
| <b>AUTHORS</b>             | de Bézenac, Christophe; Garcia-Finana, Marta; Baker, Gus; Moore, Perry; Leek, Nicola; Mohanraj, Rajiv; Bonilha, Leonardo; Richardson, Mark; Marson, Anthony; Keller, Simon |

This article was not externally reviewed at BMJ Open. Protocols that have been independently assessed prior to submission to BMJ Open are usually fast-tracked to publication on the grounds that further substantial changes will not be possible. This independent assessment will usually be external, independent review for both a substantial grant award from a non-commercial or government funder and ethics approval.
